# Supplementary material
Source: PubMed Central journal article supplement (PMC11028077)
Supplement: 262_2019_2391_MOESM1_ESM.pdf [file 262_2019_2391_MOESM1_ESM.pdf]

**Table S1.** List of mAbs used in this study.

| <b>Antibody/Marker</b> | <b>Fluorochrome</b> | <b>Clone</b> | <b>Company</b> | <b>Catalog</b> |
|------------------------|---------------------|--------------|----------------|----------------|
| <b>Dead cells</b>      | FVS 510             | -            | BD             | 564406         |
| <b>CD3</b>             | APC-H7              | SK7          | BD             | 560176         |
| <b>CD8</b>             | FITC                | SK1          | BD             | 347313         |
| <b>CD8</b>             | PE-Cy7              | RPA-T8       | BD             | 557746         |
| <b>CD4</b>             | FITC                | RPA-T4       | BD             | 555346         |
| <b>CD4</b>             | PerCPCy5.5          | RPA-T4       | BD             | 560650         |
| <b>CD56</b>            | PE                  | NCAM16.2     | BD             | 340363         |
| <b>CD25</b>            | PE                  | M-A251       | BD             | 555432         |
| <b>FoxP3</b>           | AF647               | 259D/C7      | BD             | 560045         |
| <b>CD45RO</b>          | APC                 | UCHL1        | BD             | 559865         |
| <b>CCR7</b>            | PE                  | 150503       | BD             | 560765         |
| <b>CD95</b>            | PerCP-Cy5.5         | DX2          | BD             | 561655         |
| <b>IgG2b</b>           | APC                 | MPC-11       | Biolegend      | 400320         |
| <b>PD-L1</b>           | APC                 | 29E.2A3      | Biolegend      | 329708         |
| <b>IgG1</b>            | BB515               | X40          | BD             | 564416         |
| <b>TIM-3</b>           | BB515               | 7D3          | BD             | 565568         |
| <b>IgG1</b>            | BV421               | X40          | BD             | 562438         |
| <b>PD-1</b>            | BV421               | MIH4         | BD             | 564323         |
| <b>IgG1</b>            | APC                 | MOPC-21      | BD             | 555751         |
| <b>CD69</b>            | APC                 | FN50         | BD             | 555533         |
| <b>IgG1</b>            | PE                  | MOPC-21      | BD             | 556650         |
| <b>ICOS</b>            | PE                  | DX29         | BD             | 557802         |

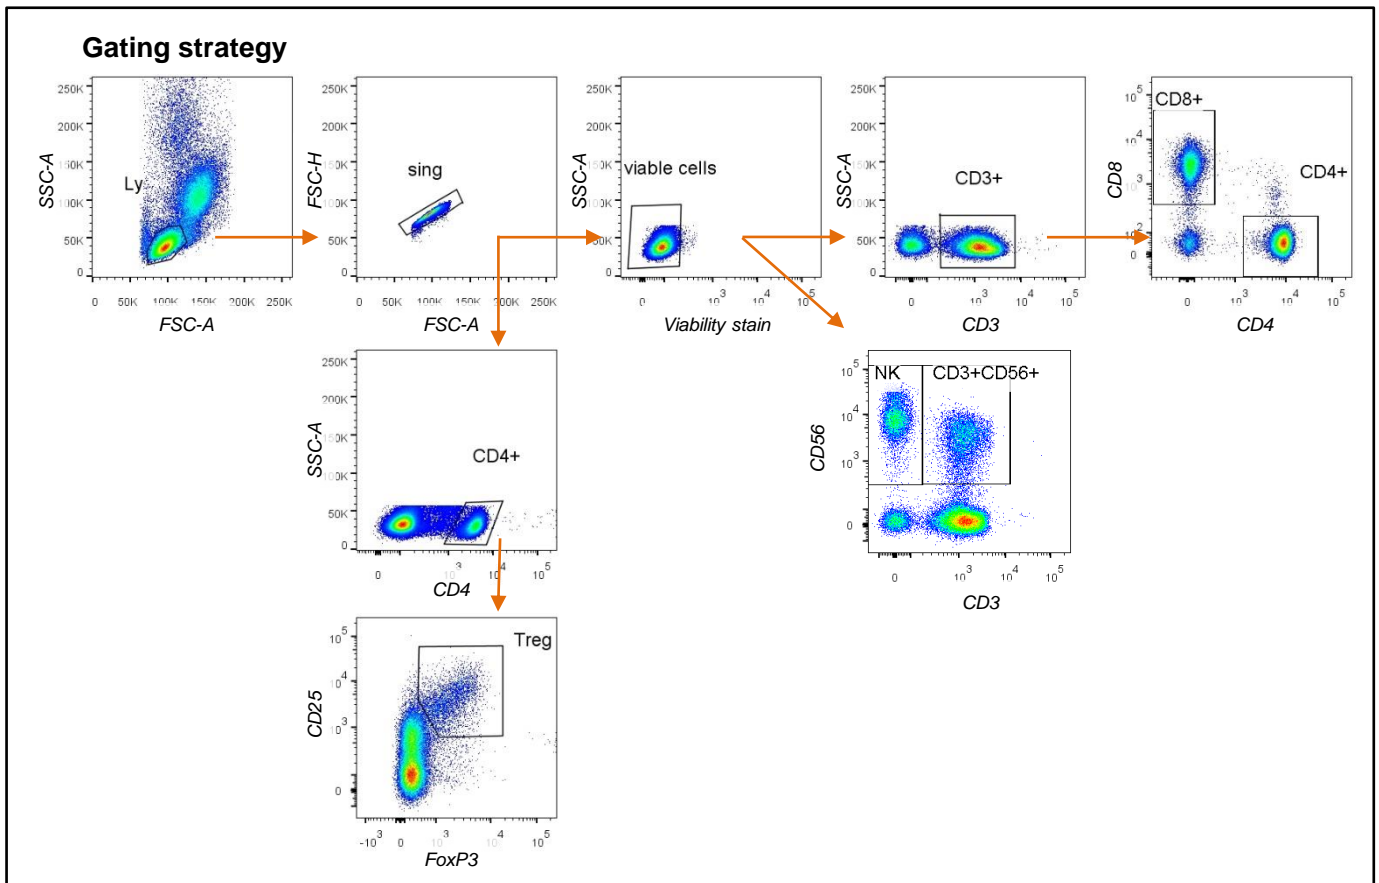

**Figure S1. Representative gating strategy.** Lymphocytes were gated using FSC-A vs SSC-A plot, single cells using FSC-A vs FSC-H plot and viable cells ( $\geq 50,000$  events) using Fixable Viability Stain 510 staining. Lymphocytes subsets were defined as CD3<sup>-</sup>CD56<sup>+</sup> NK cells, CD3<sup>+</sup>CD56<sup>+</sup> cells, CD4<sup>+</sup>CD3<sup>+</sup> T cells, CD8<sup>+</sup>CD3<sup>+</sup> T cells and CD4<sup>+</sup>CD25<sup>+</sup>FoxP3<sup>+</sup> Tregs.

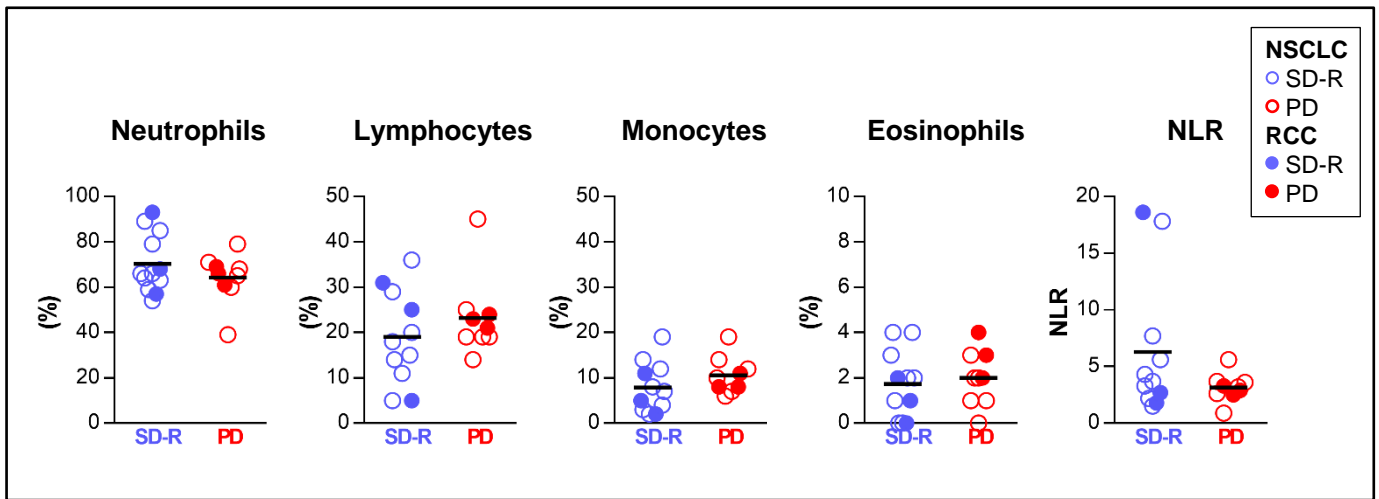

**Figure S2. Leukocyte subsets in PRE-treatment samples.** Frequency of neutrophils, lymphocytes, monocytes and eosinophils, and lymphocyte-to-neutrophil ratio (NLR) are shown for both stable disease-response (SD-R) and progressive disease (PD) patients.

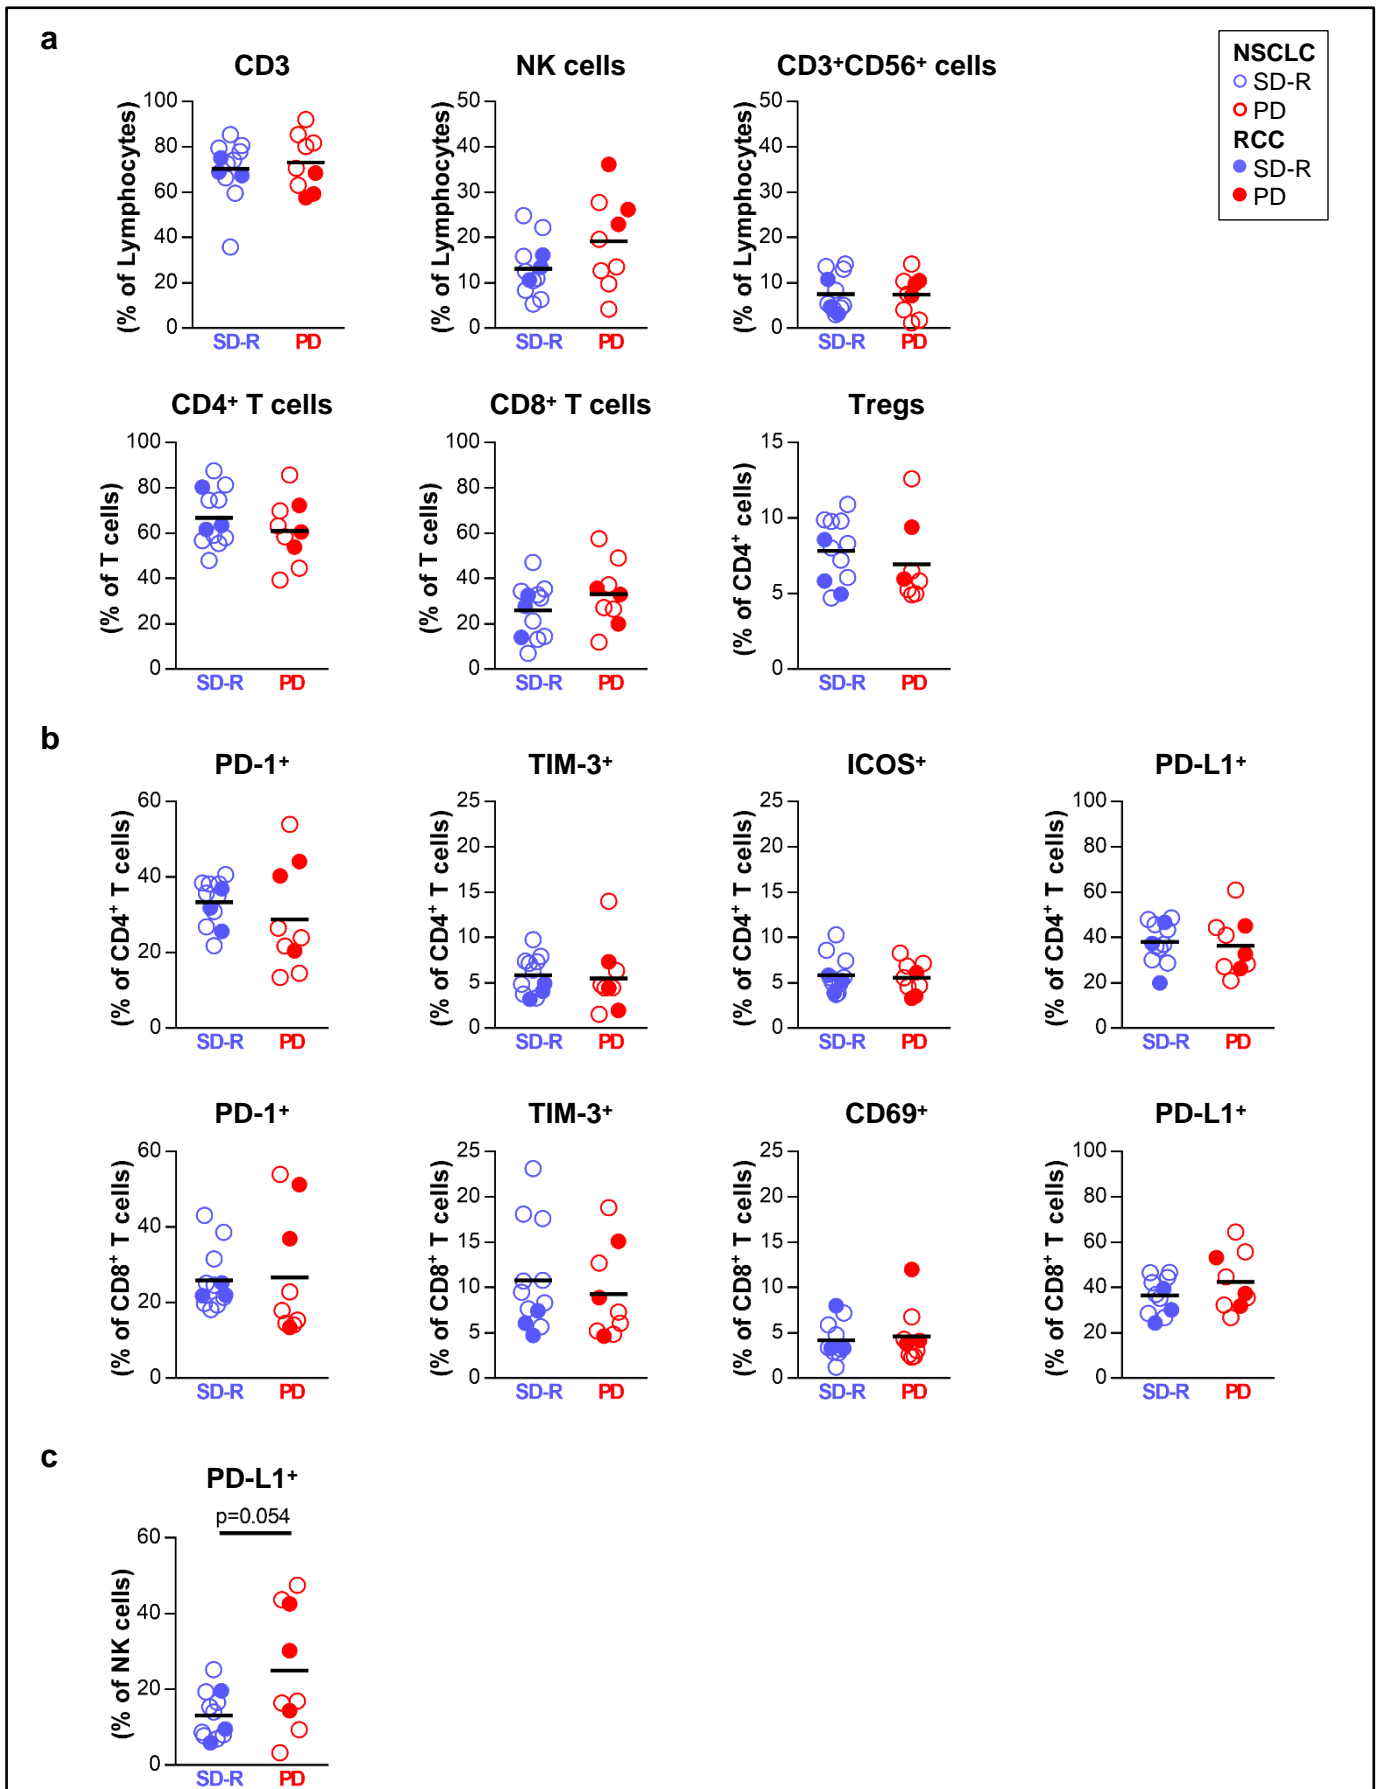

**Figure S3. Lymphocyte subsets in PRE-treatment samples. a Above:** Frequency of CD3<sup>+</sup> T cells, NK and CD3<sup>+</sup>CD56<sup>+</sup> cells within lymphocytes. **Below:** Frequency of CD4<sup>+</sup> and CD8<sup>+</sup> cells within T cells and percentage of Tregs within CD4<sup>+</sup> cells. **b Above:** Frequency of PD-1<sup>+</sup>, TIM-3<sup>+</sup>, ICOS<sup>+</sup> and PD-L1<sup>+</sup> cells within CD4<sup>+</sup> T cells. **Below:** Frequency of PD-1<sup>+</sup>, TIM-3<sup>+</sup>, CD69<sup>+</sup> and PD-L1<sup>+</sup> cells within CD8<sup>+</sup> T cells. **c** Frequency of PD-L1<sup>+</sup> within NK cells.

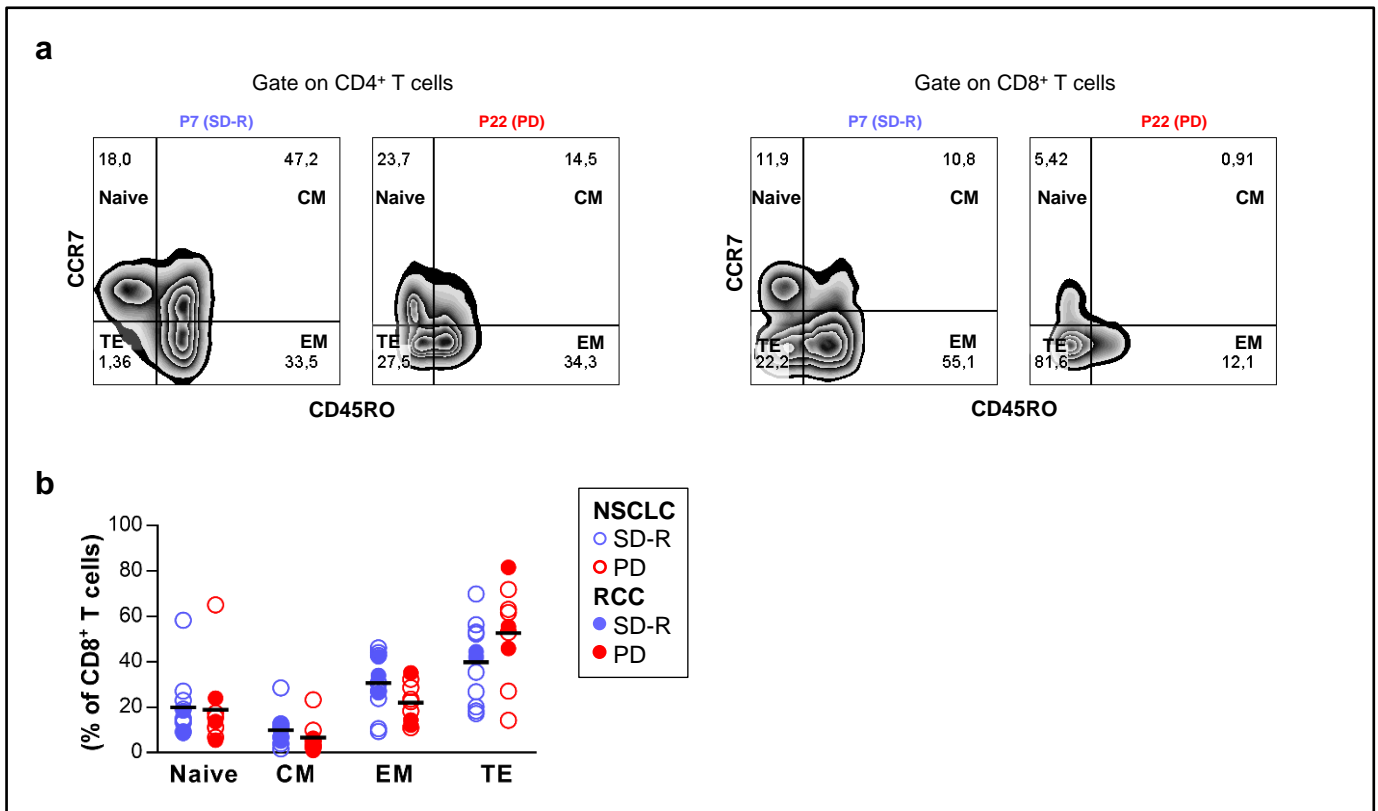

**Figure S4. Memory T cell compartment in PRE-treatment samples.** **a** Representative density plots showing memory subsets in CD4<sup>+</sup> and CD8<sup>+</sup> T cells from two patients: CD45RO<sup>-</sup>CCR7<sup>+</sup> naïve cells, CD45RO<sup>+</sup>CCR7<sup>+</sup> central memory (CM) cells, CD45RO<sup>+</sup>CCR7<sup>-</sup> effector memory (EM) cells and CD45RO<sup>-</sup>CCR7<sup>-</sup> terminal effector (TE) cells. **b** Frequency of memory CD8<sup>+</sup> T cell subsets is shown for both response groups.

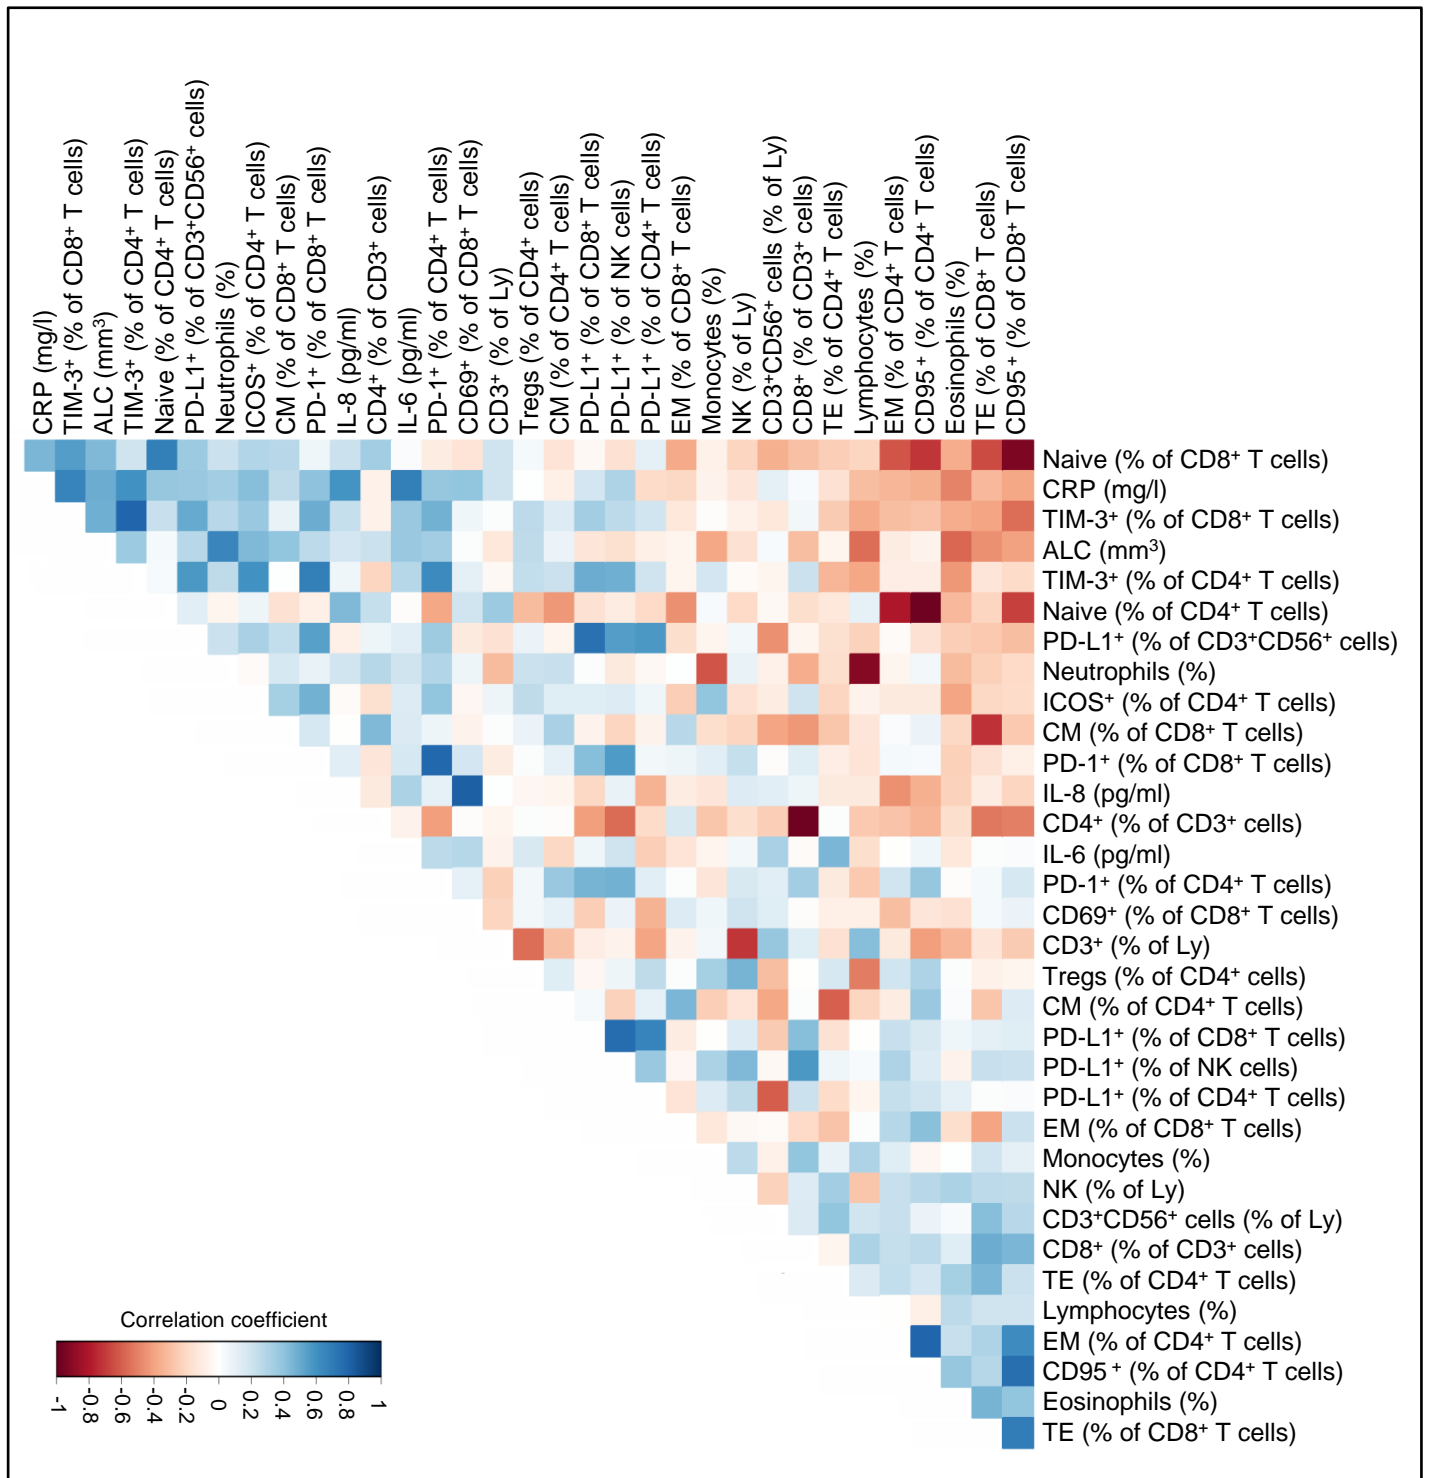

**Figure S5. Correlation matrix of baseline immune cell populations and soluble mediators.** Correlation between all immune cell populations and soluble mediators analyzed in peripheral blood collected before anti-PD-1 treatment. Correlation coefficients are represented using the color scale shown.

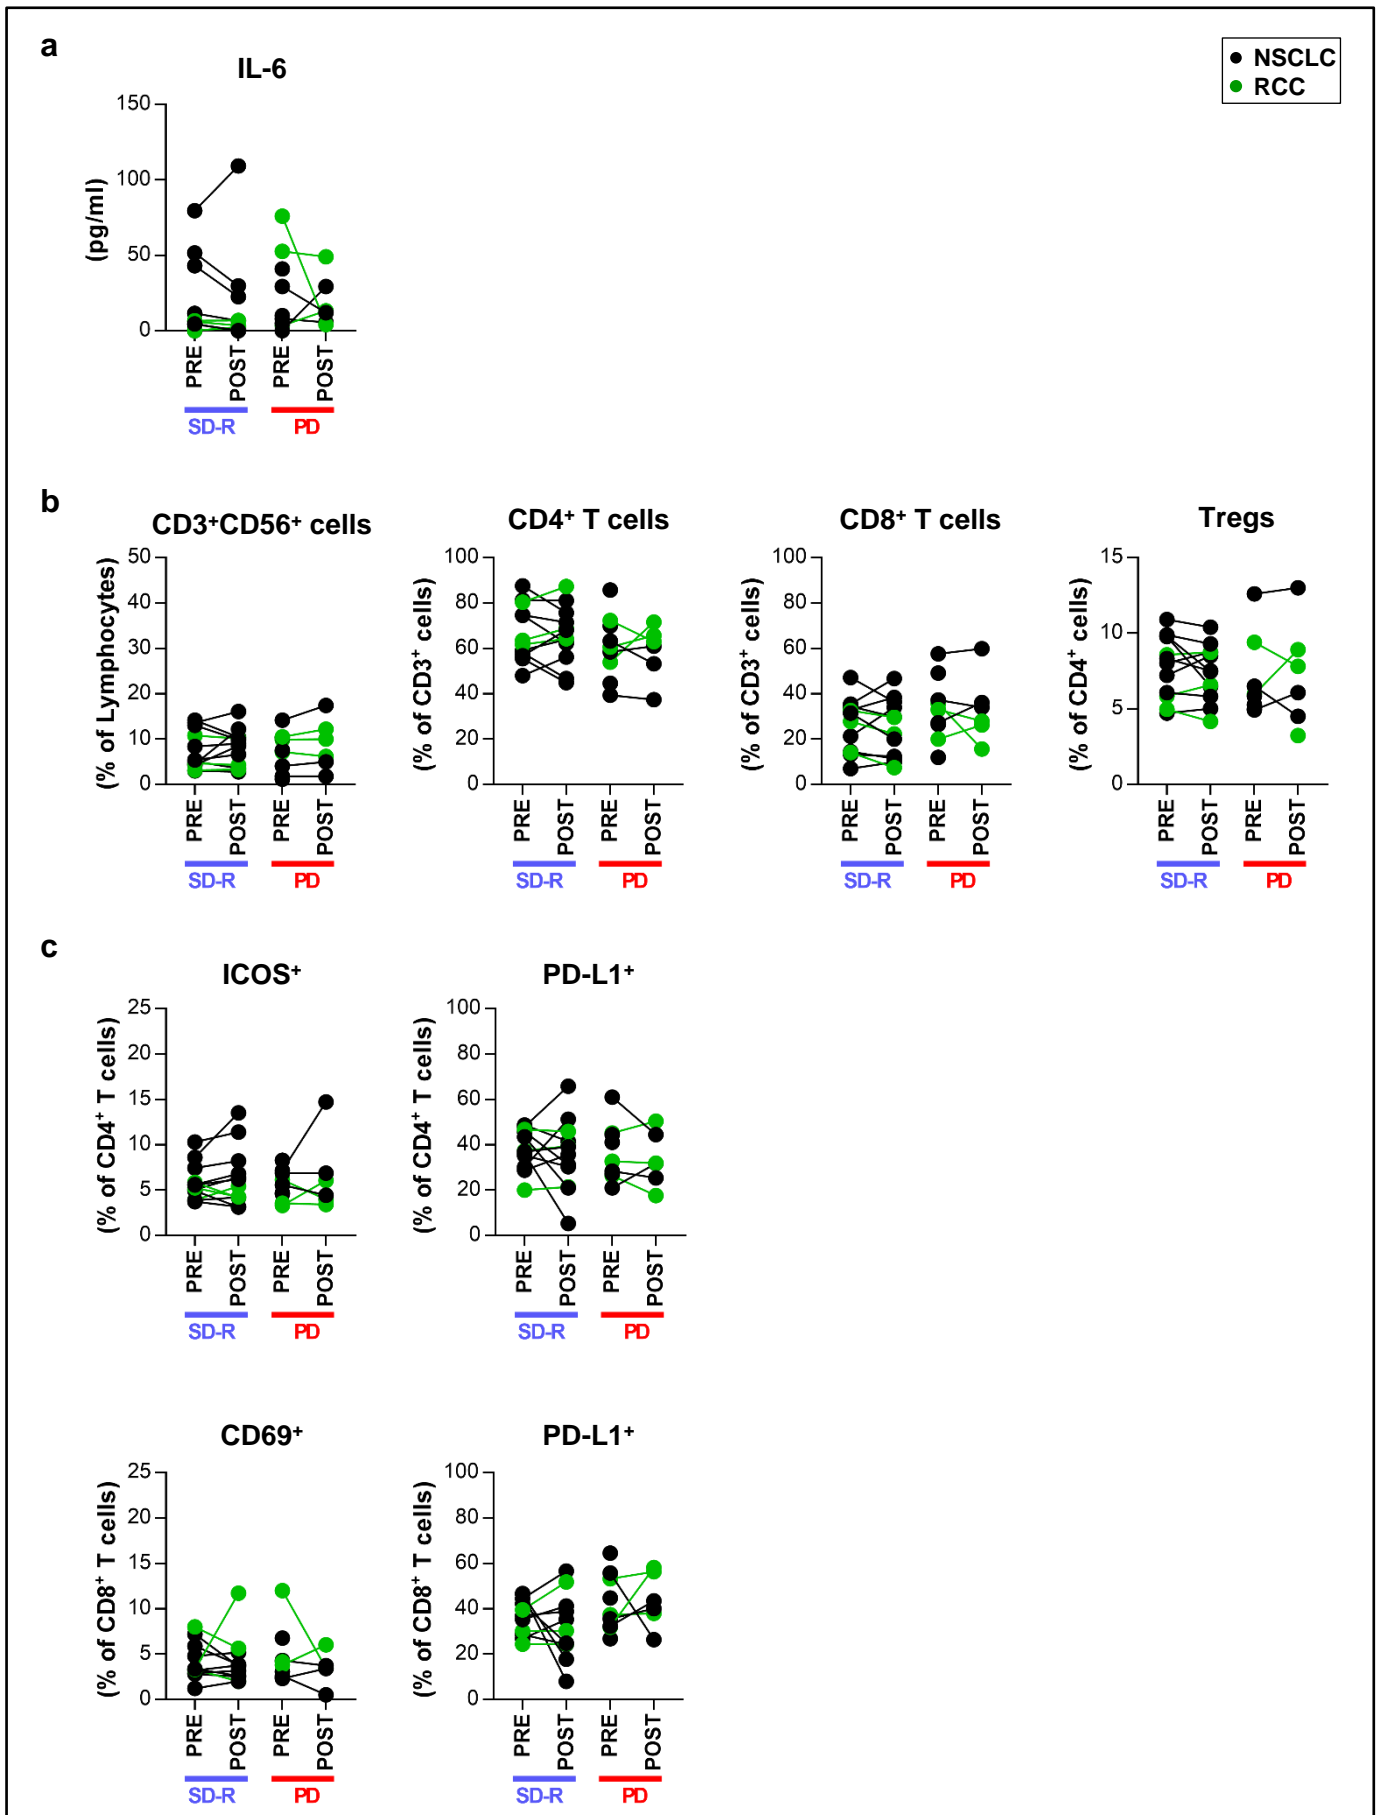

**Figure S6. Immune cell subsets after anti-PD-1 therapy.** Paired PRE and POST-treatment samples from SD-R and PD patients are shown for: **a** IL-6 plasma levels; **b** Frequency of CD3<sup>+</sup>CD56<sup>+</sup> cells within lymphocytes, CD4<sup>+</sup> and CD8<sup>+</sup> T cells within T cells, and Tregs; **c** Frequency of ICOS<sup>+</sup> and PD-L1<sup>+</sup> cells within CD4<sup>+</sup> T cells (above) and frequency of CD69<sup>+</sup> and PD-L1<sup>+</sup> within CD8<sup>+</sup> T cells (below).

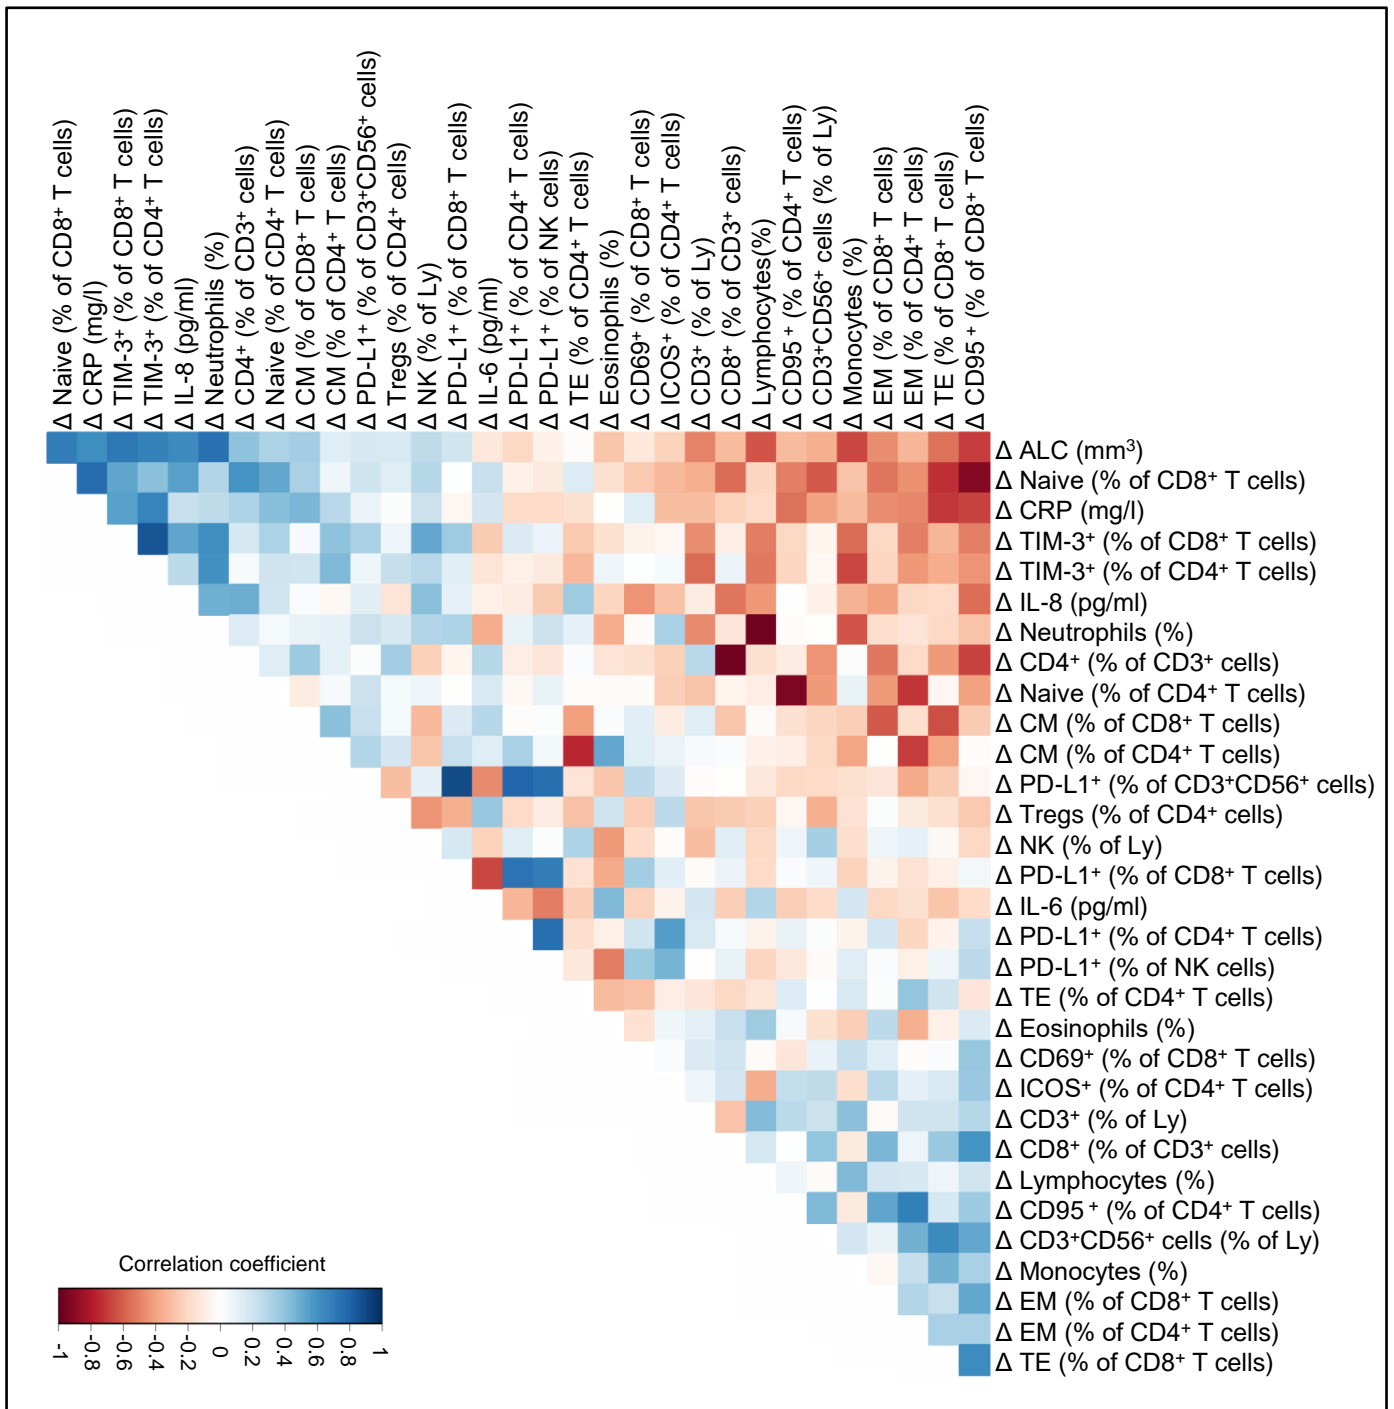

**Figure S7. Correlation matrix of the variation in immune cell populations and soluble mediators.** Correlation between the variation ( $\Delta$ : POST minus PRE values) of all immune cell populations and soluble mediators analyzed in peripheral blood. Correlation coefficients are represented using the color scale shown.
